# Supplementary material
Source: PubMed Central journal article supplement (PMC1276071)
Supplement: pnas_0506109102_1.pdf [file pnas_0506109102_1.pdf]

**Table 1: Chemical shifts for Sample A and Sample B**

| Res. | Sample A        |                  |                          |                         |                          |                          |                            | Sample B              |                 |                  |                          |                         |                          |                          |
|------|-----------------|------------------|--------------------------|-------------------------|--------------------------|--------------------------|----------------------------|-----------------------|-----------------|------------------|--------------------------|-------------------------|--------------------------|--------------------------|
|      | <sup>15</sup> N | <sup>13</sup> CO | <sup>13</sup> C $\alpha$ | <sup>13</sup> C $\beta$ | <sup>13</sup> C $\gamma$ | <sup>13</sup> C $\delta$ | <sup>13</sup> C $\epsilon$ | <sup>13</sup> C $\xi$ | <sup>15</sup> N | <sup>13</sup> CO | <sup>13</sup> C $\alpha$ | <sup>13</sup> C $\beta$ | <sup>13</sup> C $\gamma$ | <sup>13</sup> C $\delta$ |
| L38  | 126.8           |                  | 53.5                     | 41.9                    | 29.1                     | 24.8                     |                            |                       | 126.9           |                  | 56.4                     | 42.1                    | 30.1                     |                          |
| Y39  | 123.1           |                  | 57.9                     | 38.4                    | 132.5                    | 133.8                    | 118.5                      | 157.3                 |                 |                  | 57.3                     | 38.9                    |                          |                          |
| V40  |                 |                  | 60.4                     | 36.0                    | 21.3                     |                          |                            |                       | n.a.            | n.a.             | n.a.                     | n.a.                    | n.a.                     |                          |
| G41  |                 |                  | 44.3                     |                         |                          |                          |                            |                       |                 |                  | 43.9                     |                         |                          |                          |
| S42  | 114.1           | 174.4            | 55.5                     | 67.5                    |                          |                          |                            |                       | 116.4           |                  | 54.5                     | 64.2                    |                          |                          |
| H50  |                 | 175.3            | 58.4                     | 29.6                    | 130.7                    | 117.8                    |                            |                       |                 |                  | 59.0                     | 29.3                    |                          |                          |
| G51  |                 |                  |                          |                         |                          |                          |                            |                       | 105.0           | 171.6            |                          |                         |                          |                          |
| V52  |                 |                  | 60.3                     | 36.0                    | 21.3                     |                          |                            |                       | n.a.            | n.a.             | n.a.                     | n.a.                    | n.a.                     |                          |
| A53  | 128.5           | 176.4            | 49.4                     | 23.3                    |                          |                          |                            |                       | 125.9           |                  | 51.8                     | 21.0                    |                          |                          |
| T54  | 109.9           | 173.6            | 58.4                     | 71.9                    | 21.3                     |                          |                            |                       | 113.9           |                  | 58.7                     | 72.0                    | 23.1                     |                          |
| V55  | 118.6           | 175.7            | 60.7                     | 36.0                    | 21.3                     |                          |                            |                       | 120.9           | n.a.             | n.a.                     | n.a.                    | n.a.                     |                          |
| A56  | 130.1           | 175.5            | 50.1                     | 21.4                    |                          |                          |                            |                       | 129.1           |                  | 49.0                     | 22.0                    |                          |                          |
| E57  | 121.5           |                  | 54.5                     | 33.2                    | 36.0                     | 184.5                    |                            |                       | 120.7           |                  | 54.1                     | 33.0                    | 36.0                     | 183.3                    |
| E61  | 126.6           |                  | 54.5                     | 33.0                    | 35.8                     | 182.9                    |                            |                       |                 |                  | 55.5                     | 32.7                    | 36.2                     |                          |
| Q62  | 126.2           |                  | 54.3                     | 32.9                    | 34.1                     |                          |                            |                       | 126.4           |                  | 54.0                     | 31.6                    |                          |                          |
| V63  | 128.9           |                  | 60.5                     | 35.5                    | 21.3                     |                          |                            |                       | n.a.            | n.a.             | n.a.                     | n.a.                    | n.a.                     |                          |
| T64  | 124.8           |                  | 62.0                     | 69.9                    | 22.7                     |                          |                            |                       |                 |                  | 61.3                     | 69.9                    | 21.7                     |                          |
| N65  | 125.2           |                  | 52.3                     | 43.0                    | 177.3                    |                          |                            |                       | 125.0           |                  | 52.1                     | 42.9                    | 177.2                    |                          |
| V66  | 125.3           |                  |                          |                         |                          |                          |                            |                       | n.a.            | n.a.             | n.a.                     | n.a.                    | n.a.                     |                          |
| G67  |                 |                  | 47.3                     |                         |                          |                          |                            |                       | 110.5           |                  | 46.4                     |                         |                          |                          |
| G68  | 110.0           |                  | 45.0                     |                         |                          |                          |                            |                       | 103.4           |                  | 44.1                     |                         |                          |                          |
| A69  | 125.5           |                  | 50.2                     | 24.8                    |                          |                          |                            |                       |                 |                  | 50.5                     | 22.7                    |                          |                          |
| V70  | 118.6           |                  | 60.3                     | 36.0                    | 21.3                     |                          |                            |                       | n.a.            | n.a.             | n.a.                     | n.a.                    | n.a.                     |                          |
| V71  |                 |                  | 59.1                     | 35.3                    | 21.3                     |                          |                            |                       | n.a.            | n.a.             | n.a.                     | n.a.                    | n.a.                     |                          |
| T72  | 119.3           |                  | 55.7                     | 69.2                    | 19.2                     |                          |                            |                       | 111.7           |                  | 59.3                     | 68.5                    | 19.0                     |                          |
| G73  | 114.6           | 170.9            | 48.4                     |                         |                          |                          |                            |                       | 118.7           |                  | 47.6                     |                         |                          |                          |
| V74  | 121.1           |                  |                          |                         |                          |                          |                            |                       |                 |                  |                          |                         |                          |                          |
| T75  | 122.7           | 173.8            | 60.4                     | 72.0                    | 21.7                     |                          |                            |                       | 123.9           |                  | 59.7                     | 71.4                    |                          |                          |
| A76  | 125.4           | 173.2            | 51.9                     | 16.8                    |                          |                          |                            |                       | 123.9           |                  | 49.4                     | 18.2                    |                          |                          |
| V77  | 116.8           |                  | 60.5                     | 35.5                    | 21.3                     |                          |                            |                       | n.a.            | n.a.             | n.a.                     | n.a.                    | n.a.                     |                          |
| A78  | 125.2           | 176.9            | 50.1                     | 25.7                    |                          |                          |                            |                       | 128.8           |                  | 50.2                     | 20.4                    |                          |                          |
| Q79  | 108.5           | 173.7            | 54.2                     | 30.1                    | 32.3                     | 179.5                    |                            |                       | 116.8           |                  | 52.3                     | 31.1                    | 33.1                     | 177.7                    |
| K80  |                 |                  | 54.0                     |                         |                          |                          |                            |                       | n.a.            | n.a.             | n.a.                     | n.a.                    | n.a.                     | n.a.                     |
| T81  | 124.6           | 174.5            | 61.6                     | 69.9                    | 22.2                     |                          |                            |                       |                 |                  |                          |                         |                          |                          |
| V82  | 124.5           |                  | 61.7                     | 34.5                    | 21.3                     |                          |                            |                       | n.a.            | n.a.             | n.a.                     | n.a.                    | n.a.                     |                          |
| E83  | 122.1           |                  | 57.5                     | 26.6                    | 37.4                     | 184.3                    |                            |                       | 114.6           |                  | 56.7                     | 27.6                    | 36.8                     | 183.2                    |
| G84  | 104.4           | 170.1            | 43.9                     |                         |                          |                          |                            |                       | 105.2           |                  | 43.9                     |                         |                          |                          |
| A85  | 117.8           | 178.3            | 51.7                     | 19.4                    |                          |                          |                            |                       | 119.8           |                  | 51.3                     | 19.0                    |                          |                          |
| G86  | 112.6           |                  | 45.1                     |                         |                          |                          |                            |                       | 106.8           |                  | 45.2                     |                         |                          |                          |
| S87  | 120.5           | 173.2            | 56.4                     | 65.4                    |                          |                          |                            |                       | 107.3           | 173.0            | 56.2                     | 67.1                    |                          |                          |
| I88  |                 |                  |                          |                         | 28.0/                    |                          |                            |                       |                 |                  |                          |                         | 28.2/                    |                          |
|      | 121.5           | 175.5            | 59.2                     | 42.1                    | 18.0                     | 15.0                     |                            |                       | 118.5           |                  | 60.6                     | 41.8                    | 18.7                     | 14.4                     |
| A89  | 126.0           | 172.7            | 51.8                     | 16.4                    |                          |                          |                            |                       | 125.4           |                  | 51.7                     | 16.4                    |                          |                          |
| A90  | 120.3           |                  | 49.6                     | 21.4                    |                          |                          |                            |                       | 127.8           |                  | 49.5                     | 20.8                    |                          |                          |
| A91  | 123.0           |                  | 50.0                     | 21.4                    |                          |                          |                            |                       |                 |                  | 49.4                     | 21.3                    |                          |                          |
| T92  | 123.9           |                  | 60.9                     | 70.4                    | 21.4                     |                          |                            |                       | 118.2           |                  | 60.6                     | 68.4                    | 21.8                     |                          |
| G93  | 110.9           |                  | 44.5                     |                         |                          |                          |                            |                       | 113.5           |                  | 43.9                     |                         |                          |                          |
| F94  | 116.3           |                  | 57.0                     | 41.4                    |                          |                          |                            |                       |                 |                  | 57.9                     | 37.7                    |                          |                          |

|      |                                                  |      |       |       |       |       |      |      |      |      |      |  |
|------|--------------------------------------------------|------|-------|-------|-------|-------|------|------|------|------|------|--|
| V95  | 117.4                                            |      |       |       |       |       | n.a. | n.a. | n.a. | n.a. | n.a. |  |
|      | Residues assigned sequentially in the C terminus |      |       |       |       |       |      |      |      |      |      |  |
| A107 | 50.5                                             | 17.8 |       |       |       |       |      |      |      |      |      |  |
| I112 |                                                  |      | 27.3/ |       |       |       |      |      |      |      |      |  |
|      | 61.1                                             | 38.8 | 17.7  | 13.2  |       |       |      |      |      |      |      |  |
| D119 | 54.4                                             | 41.2 | 180.0 |       |       |       |      |      |      |      |      |  |
| S129 | 58.3                                             | 64.0 |       |       |       |       |      |      |      |      |      |  |
|      | Type-assignment for residues in the C terminus   |      |       |       |       |       |      |      |      |      |      |  |
| A    | 52.6                                             | 18.8 |       |       |       |       |      |      |      |      |      |  |
| D    | 54.4                                             | 41.2 | 180.0 |       |       |       |      |      |      |      |      |  |
| E    | 56.7                                             | 30.4 | 36.4  | 184.0 |       |       |      |      |      |      |      |  |
| G    | 45.0                                             |      |       |       |       |       |      |      |      |      |      |  |
| L    | 54.0                                             | 38.0 | 29.0  | 25.0  |       |       |      |      |      |      |      |  |
| M    | 53.3                                             | 32.2 |       |       |       |       |      |      | 16.8 |      |      |  |
| P    | 63.2                                             | 32.2 | 27.5  | 50.7  |       |       |      |      |      |      |      |  |
| Q    | 55.7                                             | 29.7 | 33.7  | 180.2 |       |       |      |      |      |      |      |  |
| V    | 62.0                                             | 32.0 | 20.8  |       |       |       |      |      |      |      |      |  |
| Y    | 57.8                                             | 39.0 | 130.3 | 117.0 | 133.0 | 157.0 |      |      |      |      |      |  |

Assignments for form A were obtained from spectra obtained on two samples, one consisting of  $\approx 6$  mg of U- $^{13}\text{C}$ ,  $^{15}\text{N}$ ] labeled AS in a 2.5 mm rotor, and one consisting of  $\approx 8$  mg of U- $^{13}\text{C}$ ,  $^{15}\text{N}$ [K,V] AS in a 4 mm rotor. Assignments for form B were obtained from one sample consisting of  $\approx 8$  mg of U- $^{13}\text{C}$ ,  $^{15}\text{N}$ [K,V] AS in a 4 mm rotor. n.a., not available.
